# Supplementary material
Source: PubMed Central journal article supplement (PMC8608143)
Supplement: NIHMS1755665-supplement-Figure_S3.pdf [file NIHMS1755665-supplement-Figure_S3.pdf]

**Peanut Allergic Co-sensitizations (n = 107)**

|          | Ara h 1 | Ara h 2 | Ara h 3 | Ara h 6 | Ara h 8 | Ara h 9 | Cor a 1 | Cor a 8 | Cor a 9 | Cor a 11 | Cor a 14 | Jug r 1 | Jug r 2 | Ana o 3 |
|----------|---------|---------|---------|---------|---------|---------|---------|---------|---------|----------|----------|---------|---------|---------|
| Ara h 1  | 93      | 91      | 91      | 88      | 79      | 50      | 48      | 10      | 60      | 58       | 22       | 46      | 55      | 41      |
| Ara h 2  | 96      | 90      | 88      | 80      | 51      | 50      | 10      | 60      | 58      | 21       | 46       | 55      | 41      |         |
| Ara h 3  | 92      | 87      | 80      | 51      | 49      | 10      | 61      | 59      | 22      | 46       | 55       | 41      |         |         |
| Ara h 6  | 88      | 79      | 50      | 47      | 10      | 57      | 54      | 21      | 45      | 53       | 38       |         |         |         |
| Ara h 8  | 80      | 48      | 46      | 10      | 55      | 54      | 21      | 41      | 50      | 38       |          |         |         |         |
| Ara h 9  | 52      | 34      | 9       | 46      | 45      | 19      | 35      | 41      | 31      |          |          |         |         |         |
| Cor a 1  | 50      | 10      | 38      | 38      | 21      | 30      | 36      | 26      |         |          |          |         |         |         |
| Cor a 8  | 10      | 9       | 9       | 8       | 9       | 9       | 8       |         |         |          |          |         |         |         |
| Cor a 9  | 64      | 58      | 22      | 41      | 49      | 40      |         |         |         |          |          |         |         |         |
| Cor a 11 | 62      | 22      | 37      | 47      | 39      |         |         |         |         |          |          |         |         |         |
| Cor a 14 | 23      | 21      | 22      | 21      |         |         |         |         |         |          |          |         |         |         |
| Jug r 1  | 48      | 48      | 31      |         |         |         |         |         |         |          |          |         |         |         |
| Jug r 2  | 58      | 36      |         |         |         |         |         |         |         |          |          |         |         |         |
| Ana o 3  | 43      |         |         |         |         |         |         |         |         |          |          |         |         |         |

**A**

**Hazelnut Allergic Co-sensitizations (n = 66)**

|          | Ara h 1 | Ara h 2 | Ara h 3 | Ara h 6 | Ara h 8 | Ara h 9 | Cor a 1 | Cor a 8 | Cor a 9 | Cor a 11 | Cor a 14 | Jug r 1 | Jug r 2 | Ana o 3 |
|----------|---------|---------|---------|---------|---------|---------|---------|---------|---------|----------|----------|---------|---------|---------|
| Ara h 1  | 71      | 64      | 71      | 61      | 59      | 48      | 55      | 18      | 59      | 58       | 45       | 58      | 65      | 52      |
| Ara h 2  | 67      | 65      | 58      | 58      | 44      | 50      | 17      | 55      | 53      | 39       | 55       | 61      | 48      |         |
| Ara h 3  | 80      | 61      | 62      | 52      | 61      | 18      | 67      | 65      | 52      | 65       | 73       | 59      |         |         |
| Ara h 6  | 62      | 55      | 39      | 48      | 15      | 50      | 48      | 39      | 52      | 56       | 44       |         |         |         |
| Ara h 8  | 68      | 47      | 58      | 17      | 56      | 55      | 41      | 52      | 59      | 48       |          |         |         |         |
| Ara h 9  | 58      | 47      | 17      | 53      | 53      | 38      | 48      | 53      | 47      |          |          |         |         |         |
| Cor a 1  | 71      | 18      | 59      | 58      | 47      | 52      | 59      | 53      |         |          |          |         |         |         |
| Cor a 8  | 20      | 17      | 18      | 14      | 17      | 18      | 17      |         |         |          |          |         |         |         |
| Cor a 9  | 82      | 80      | 61      | 70      | 77      | 71      |         |         |         |          |          |         |         |         |
| Cor a 11 | 82      | 61      | 68      | 76      | 73      |         |         |         |         |          |          |         |         |         |
| Cor a 14 | 62      | 56      | 59      | 55      |         |         |         |         |         |          |          |         |         |         |
| Jug r 1  | 76      | 76      | 62      |         |         |         |         |         |         |          |          |         |         |         |
| Jug r 2  | 85      | 70      |         |         |         |         |         |         |         |          |          |         |         |         |
| Ana o 3  | 74      |         |         |         |         |         |         |         |         |          |          |         |         |         |

**B**

**Walnut Allergic Co-sensitizations (n = 58)**

|          | Ara h 1 | Ara h 2 | Ara h 3 | Ara h 6 | Ara h 8 | Ara h 9 | Cor a 1 | Cor a 8 | Cor a 9 | Cor a 11 | Cor a 14 | Jug r 1 | Jug r 2 | Ana o 3 |
|----------|---------|---------|---------|---------|---------|---------|---------|---------|---------|----------|----------|---------|---------|---------|
| Ara h 1  | 74      | 69      | 71      | 64      | 62      | 53      | 48      | 17      | 64      | 62       | 40       | 71      | 71      | 53      |
| Ara h 2  | 72      | 67      | 64      | 62      | 52      | 48      | 17      | 62      | 60      | 38       | 69       | 69      | 52      |         |
| Ara h 3  | 78      | 62      | 64      | 53      | 52      | 17      | 69      | 66      | 45      | 74       | 74       | 59      |         |         |
| Ara h 6  | 66      | 60      | 48      | 47      | 16      | 55      | 53      | 36      | 62      | 62       | 47       |         |         |         |
| Ara h 8  | 66      | 52      | 52      | 17      | 59      | 57      | 38      | 62      | 62      | 48       |          |         |         |         |
| Ara h 9  | 57      | 43      | 16      | 55      | 55      | 34      | 55      | 55      | 47      |          |          |         |         |         |
| Cor a 1  | 57      | 17      | 53      | 52      | 38      | 53      | 53      | 43      |         |          |          |         |         |         |
| Cor a 8  | 17      | 16      | 16      | 14      | 17      | 17      | 14      |         |         |          |          |         |         |         |
| Cor a 9  | 84      | 81      | 52      | 83      | 83      | 71      |         |         |         |          |          |         |         |         |
| Cor a 11 | 81      | 52      | 79      | 79      | 69      |         |         |         |         |          |          |         |         |         |
| Cor a 14 | 52      | 52      | 52      | 47      |         |         |         |         |         |          |          |         |         |         |
| Jug r 1  | 97      | 95      | 74      |         |         |         |         |         |         |          |          |         |         |         |
| Jug r 2  | 95      | 74      |         |         |         |         |         |         |         |          |          |         |         |         |
| Ana o 3  | 76      |         |         |         |         |         |         |         |         |          |          |         |         |         |

**C**

**Cashew or Pistachio Allergic Co-sensitizations (n = 70)**

|          | Ara h 1 | Ara h 2 | Ara h 3 | Ara h 6 | Ara h 8 | Ara h 9 | Cor a 1 | Cor a 8 | Cor a 9 | Cor a 11 | Cor a 14 | Jug r 1 | Jug r 2 | Ana o 3 |
|----------|---------|---------|---------|---------|---------|---------|---------|---------|---------|----------|----------|---------|---------|---------|
| Ara h 1  | 73      | 69      | 73      | 64      | 64      | 54      | 47      | 16      | 69      | 67       | 39       | 56      | 63      | 63      |
| Ara h 2  | 71      | 70      | 64      | 64      | 53      | 47      | 16      | 67      | 66      | 37       | 54       | 61      | 61      |         |
| Ara h 3  | 81      | 64      | 66      | 54      | 53      | 16      | 76      | 74      | 44      | 63       | 70       | 71      |         |         |
| Ara h 6  | 64      | 63      | 49      | 44      | 14      | 60      | 59      | 33      | 47      | 54       | 54       |         |         |         |
| Ara h 8  | 69      | 50      | 50      | 16      | 66      | 64      | 36      | 50      | 57      | 60       |          |         |         |         |
| Ara h 9  | 56      | 44      | 16      | 56      | 54      | 31      | 46      | 51      | 50      |          |          |         |         |         |
| Cor a 1  | 59      | 16      | 57      | 56      | 37      | 46      | 51      | 51      |         |          |          |         |         |         |
| Cor a 8  | 16      | 16      | 16      | 13      | 14      | 14      | 14      |         |         |          |          |         |         |         |
| Cor a 9  | 90      | 86      | 49      | 69      | 77      | 83      |         |         |         |          |          |         |         |         |
| Cor a 11 | 86      | 49      | 67      | 76      | 79      |         |         |         |         |          |          |         |         |         |
| Cor a 14 | 49      | 47      | 47      | 46      |         |         |         |         |         |          |          |         |         |         |
| Jug r 1  | 73      | 73      | 67      |         |         |         |         |         |         |          |          |         |         |         |
| Jug r 2  | 81      | 73      |         |         |         |         |         |         |         |          |          |         |         |         |
| Ana o 3  | 90      |         |         |         |         |         |         |         |         |          |          |         |         |         |

**D**

Figure S3
