# Supplementary material
Source: PubMed Central journal article supplement (PMC8608143)

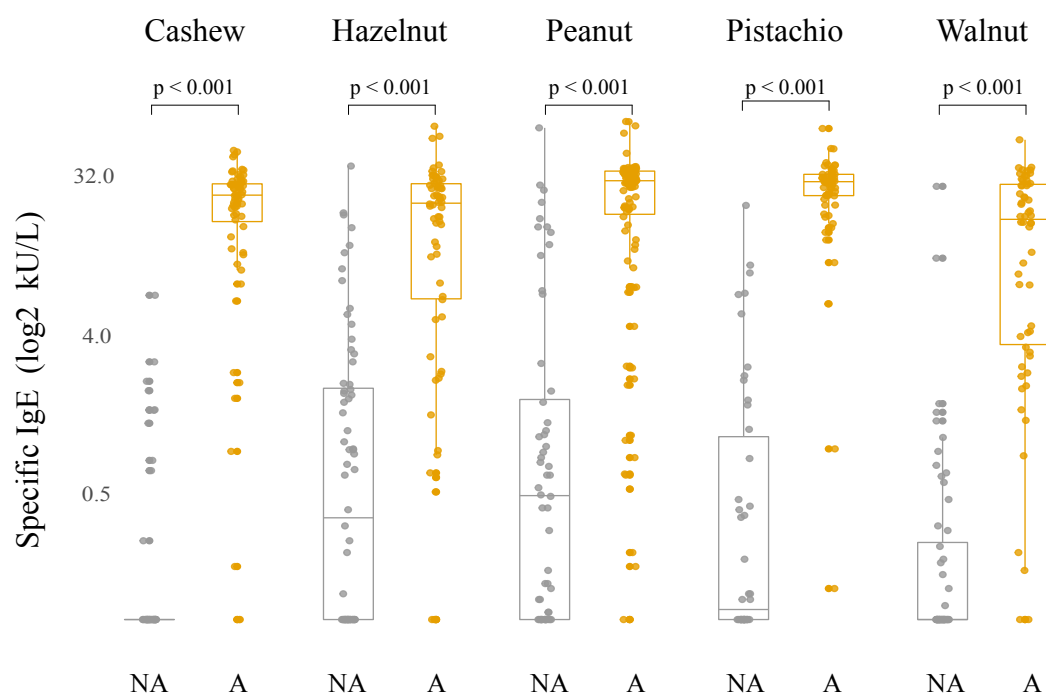

**A**

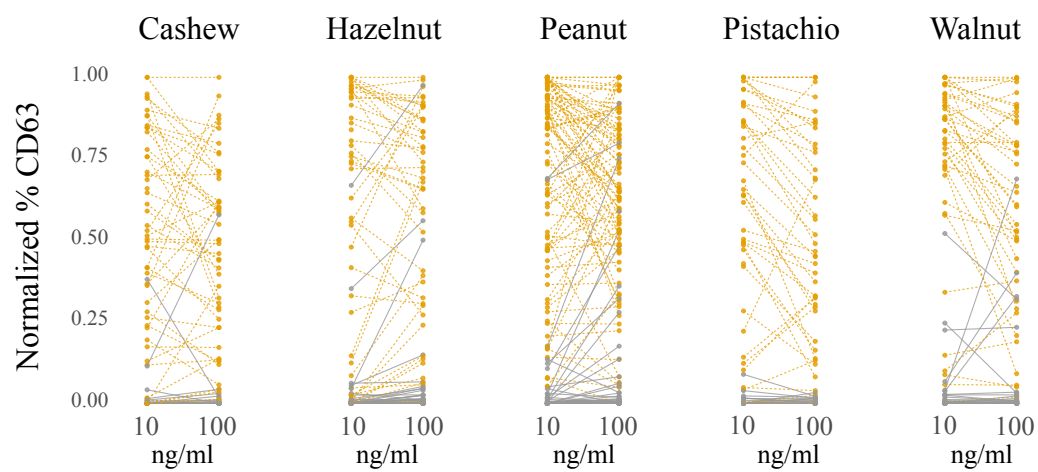

**B**

Figure S1

Supplement: NIHMS1755665-supplement-Figure_S1.pdf [file NIHMS1755665-supplement-Figure_S1.pdf]

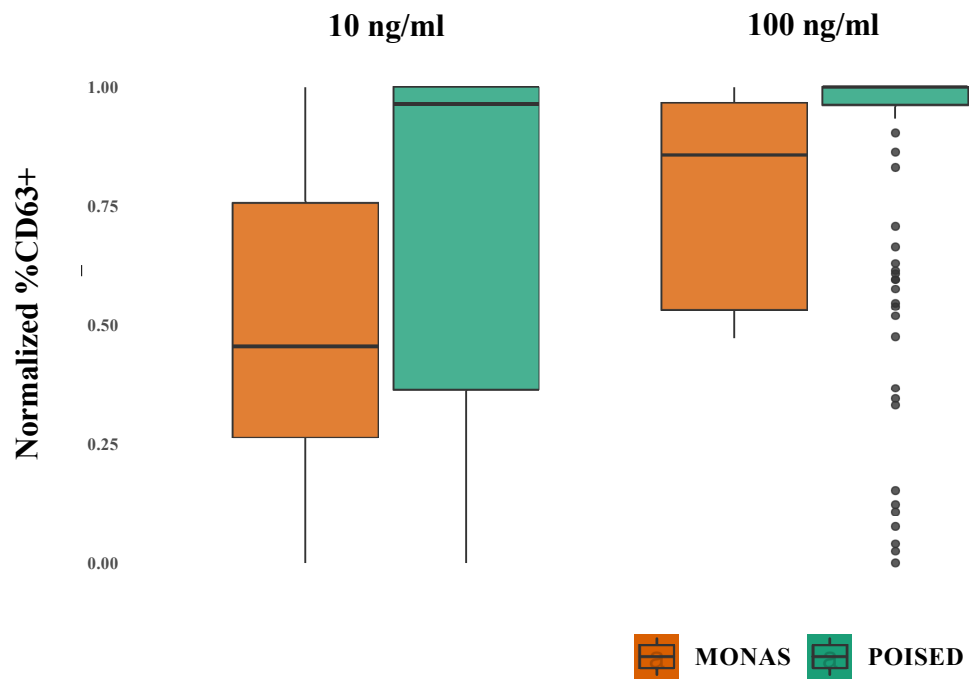

Figure S2

Supplement: NIHMS1755665-supplement-Figure_S2.pdf [file NIHMS1755665-supplement-Figure_S2.pdf]

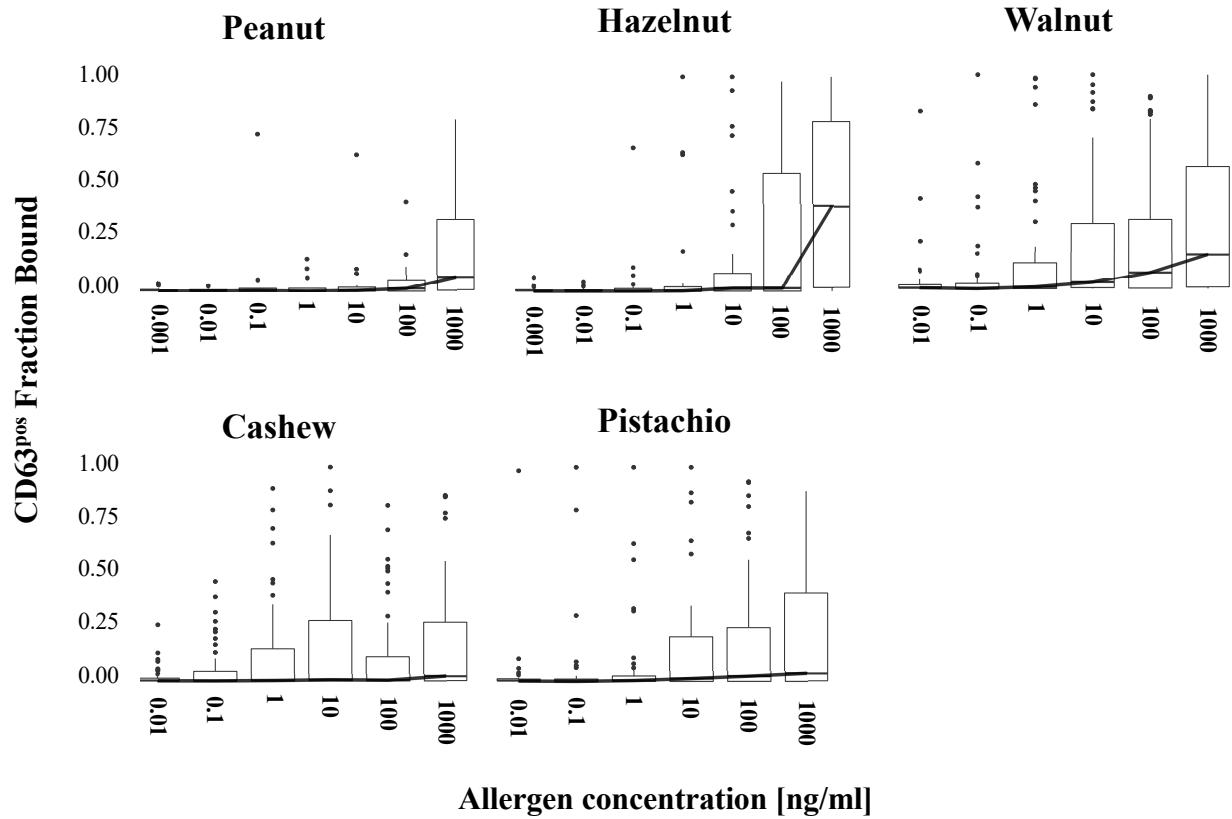

**A**

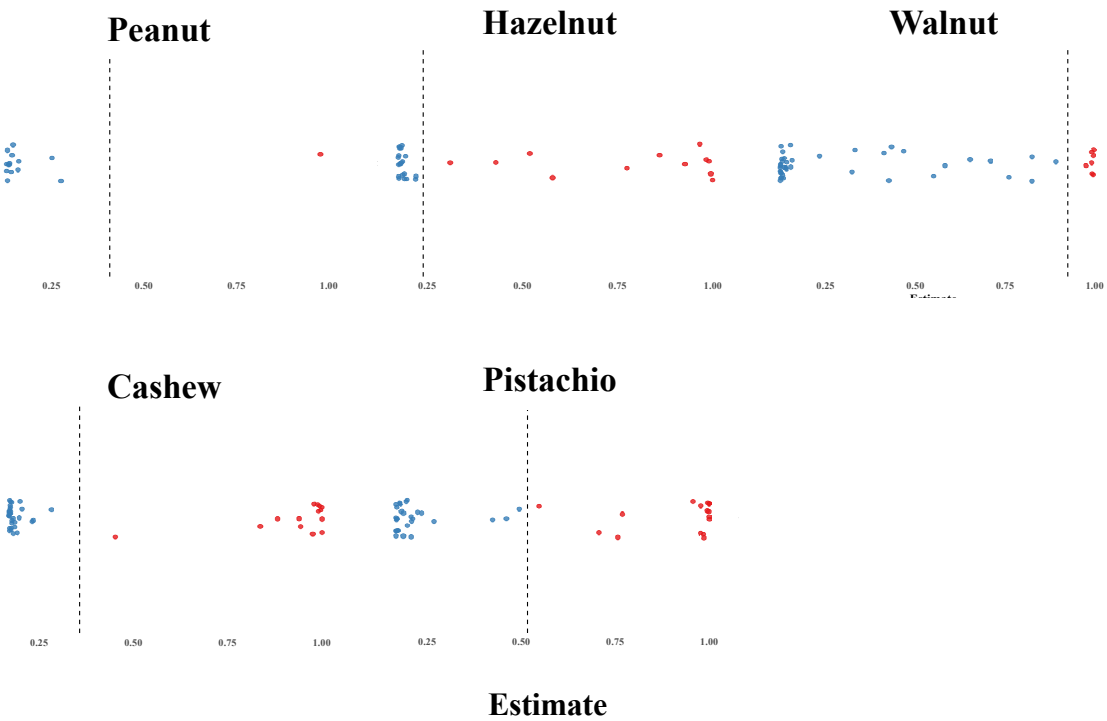

**B**

Figure S4

Supplement: NIHMS1755665-supplement-Figure_S4.pdf [file NIHMS1755665-supplement-Figure_S4.pdf]
